# Supplementary material for: Morbidity and Mortality of Patients Who Underwent Minimally Invasive Esophagectomy After Neoadjuvant Chemoradiotherapy vs Neoadjuvant Chemotherapy for Locally Advanced Esophageal Squamous Cell Carcinoma: A Randomized Clinical Trial
Source: PubMed Central journal article supplement (PMC7970392; doi:10.1001/jamasurg.2021.0133), 2021-03-17
Supplement: jamasurg-e210133-s002.pdf [file jamasurg-e210133-s002.pdf]

## Supplementary Online Content

Wang H, Tang H, Fang Y, et al. Morbidity and mortality of patients who underwent minimally invasive esophagectomy after neoadjuvant chemoradiotherapy vs neoadjuvant chemotherapy for locally advanced esophageal squamous cell carcinoma: a randomized clinical trial. *JAMA Surg*. Published online March 17, 2021. doi:10.1001/jamasurg.2021.0133

**eTable 1.** Eligibility Criteria for Enrolling Patients

**eTable 2.** The Baseline Clinical Characteristics of Patients

**eTable 3.** Adverse Events During Neoadjuvant Therapy

**eFigure.** The Overall Survival Curve of the Two Groups (Kaplan–Meier Plots)

This supplementary material has been provided by the authors to give readers additional information about their work.

**eTable 1. Eligibility Criteria for Enrolling Patients**

**Inclusion**

1. Histologically-confirmed squamous cell carcinoma of the esophagus;
2. Tumors of the esophagus are located in the thoracic cavity;
3. Pre-treatment stage as cT3-4aN0-1M0 (AJCC/UICC 7th Edition) (In case of stage cT4a, curative resectability has to be explicitly verified by the local surgical investigator prior to randomization).
4. Age is between 18 years and 75 years,
5. Eastern Cooperative Oncology Group (ECOG) performance status 0–1;
6. Adequate cardiac function. All patients should perform ECG, and those with a cardiac history or ECG abnormality should perform echocardiography with the left ventricular ejection fraction >50%.
7. Adequate respiratory function with FEV1  $\geq$  1.2 L, FEV1%  $\geq$  50% and DLCO  $\geq$  50% shown in pulmonary function tests.
8. Adequate bone marrow function (White Blood Cells  $>4 \times 10^9$  /L; Neutrophil  $>2.0 \times 10^9$  /L; Hemoglobin  $>90$  g/L; platelets  $> 100 \times 10^9$  /L);
9. Adequate liver function (Total bilirubin  $<1.5 \times$  Upper Level of Normal (ULN); Aspartate transaminase (AST) and Alanine transaminase (ALT)  $<1.5 \times$  ULN);
10. Adequate renal function (Glomerular filtration rate (CCr)  $>60$  ml/min; serum creatinine (SCr)  $\leq 120$   $\mu$ mol/L);
11. The patient has provided written informed consent and is able to understand and comply with the study;

**Exclusion**

1. Patients with non-squamous cell carcinoma histology;
2. Patients with advanced inoperable or metastatic esophageal cancer;
3. Pre-treatment stage as cT1-2 N0-1 M0 (AJCC/UICC 7th Edition);
4. Pre-treatment stage as cN2–3 or cT4b (non-curatively resectable verified by the local surgical investigator, AJCC/UICC 7th Edition);
5. Patients with another previous or current malignant disease which is likely to interfere with treatment or the assessment of response in the judgement of the local surgical investigator.
6. Any patient with a significant medical condition which is thought unlikely to tolerate the therapies.  
Such as cardiac disease (e.g. symptomatic coronary artery disease or myocardial infarction within last 12 months), clinically-significant lung disease, clinically-significant bone marrow, liver, renal function disorder;
7. Pregnant or lactating women and fertile women who will not be using contraception during the trial;
8. Allergy to any drugs;
9. Participation in another intervention clinical trial with interference to the chemotherapeutic or chemoradiotherapeutic intervention during this study or during the last 30 days prior to informed consent;
10. Expected lack of compliance with the protocol.

Abbreviations: AJCC, American Joint Committee on Cancer; ECOG PS, Eastern Cooperative Oncology Group performance status; FEV1, forced expiratory volume in 1 second.

**eTable 2.** The Baseline Clinical Characteristics of Patients

|                         | Mean (SD)             |                      | P value |
|-------------------------|-----------------------|----------------------|---------|
|                         | nCRT group<br>(n=132) | nCT group<br>(n=132) |         |
| Sex, No. (%)            |                       |                      | 0.293   |
| Male                    | 116 (87.9)            | 110 (83.3)           |         |
| Female                  | 16 (12.1)             | 22 (16.7)            |         |
| Age, years              | 61.2 (6.7)            | 61.5 (6.8)           | 0.746   |
| ECOG PS, No. (%)        |                       |                      | 0.746   |
| 0                       | 110 (83.3)            | 108 (81.8)           |         |
| 1                       | 22 (16.7)             | 24 (18.2)            |         |
| Comorbidity, No. (%)    |                       |                      | 0.505   |
| None                    | 89 (67.4)             | 94 (71.2)            |         |
| One or more             | 43 (32.6)             | 38 (28.8)            |         |
| Tumor location, No. (%) |                       |                      | 0.475   |
| upper                   | 16 (12.1)             | 13 (9.8)             |         |
| middle                  | 89 (67.4)             | 84 (63.6)            |         |
| lower                   | 27 (20.5)             | 35 (26.5)            |         |
| Clinical stage          |                       |                      | 0.720   |
| cT3N0M0                 | 27 (20.5)             | 22 (16.7)            |         |
| cT3N1M0                 | 68 (51.5)             | 69 (52.3)            |         |
| cT4aN0M0                | 10 (7.6)              | 8 (6.1)              |         |
| cT4aN1M0                | 27 (20.5)             | 33 (25.0)            |         |

NOTE: Tumor stage according to the American Joint Committee on Cancer, 8th Edition.

Abbreviations: BMI, body mass index; ECOG PS, Eastern Cooperative Oncology performance status; SD, standard deviation.

**eTable 3. Adverse Events During Neoadjuvant Therapy**

|                            | nCRT group<br>(n=131*) | nCT group<br>(n=130*) | P value |
|----------------------------|------------------------|-----------------------|---------|
| Grade 1 and 2, No. (%)     |                        |                       |         |
| Anemia                     | 52 (39.7)              | 49 (37.7)             | 0.740   |
| Granulocytopenia           | 89 (67.9)              | 82 (63.1)             | 0.409   |
| Thrombocytopenia           | 43 (32.8)              | 41 (31.5)             | 0.824   |
| Anorexia                   | 79 (60.3)              | 81 (62.3)             | 0.740   |
| Vomiting                   | 91 (69.5)              | 95 (73.1)             | 0.519   |
| Pulmonary infection        | 6 (4.6)                | 3 (2.3)               | 0.505   |
| Radiation<br>esophagitis   | 6 (4.6)                | 0                     | 0.040   |
| Liver dysfunction          | 27 (20.6)              | 25 (19.2)             | 0.780   |
| Diarrhea                   | 6 (4.6)                | 8 (6.2)               | 0.573   |
| Constipation               | 12 (9.2)               | 13 (10.0)             | 0.818   |
| Fatigue                    | 17 (13.0)              | 20 (15.4)             | 0.577   |
| Fever without<br>infection | 6 (4.6)                | 4 (3.1)               | 0.756   |
| Grade 3 and 4, No. (%)     |                        |                       |         |
| Granulocytopenia           | 10 (7.6)               | 7 (5.4)               | 0.452   |
| Anorexia                   | 1 (0.8)                | 1 (0.8)               | 1.000   |
| Vomiting                   | 1 (0.8)                | 1 (0.8)               | 1.000   |
| Pulmonary infection        | 3 (2.3)                | 0                     | 0.246   |
| Esophageal<br>perforation  | 4 (3.1)                | 0                     | 0.131   |
| Liver dysfunction          | 1 (0.8)                | 0                     | 1.000   |
| Total                      | 20 (15.3)              | 9 (6.9)               | 0.030   |

NOTE. Data are presented as No. (%). Adverse events were graded according to the National Cancer Institute's Common Terminology Criteria for Adverse Events, version 5.0. Severe Adverse Events

\*One of 132 patients in Group nCRT and 2 of 132 patients in Group nCT declined to receive treatment.

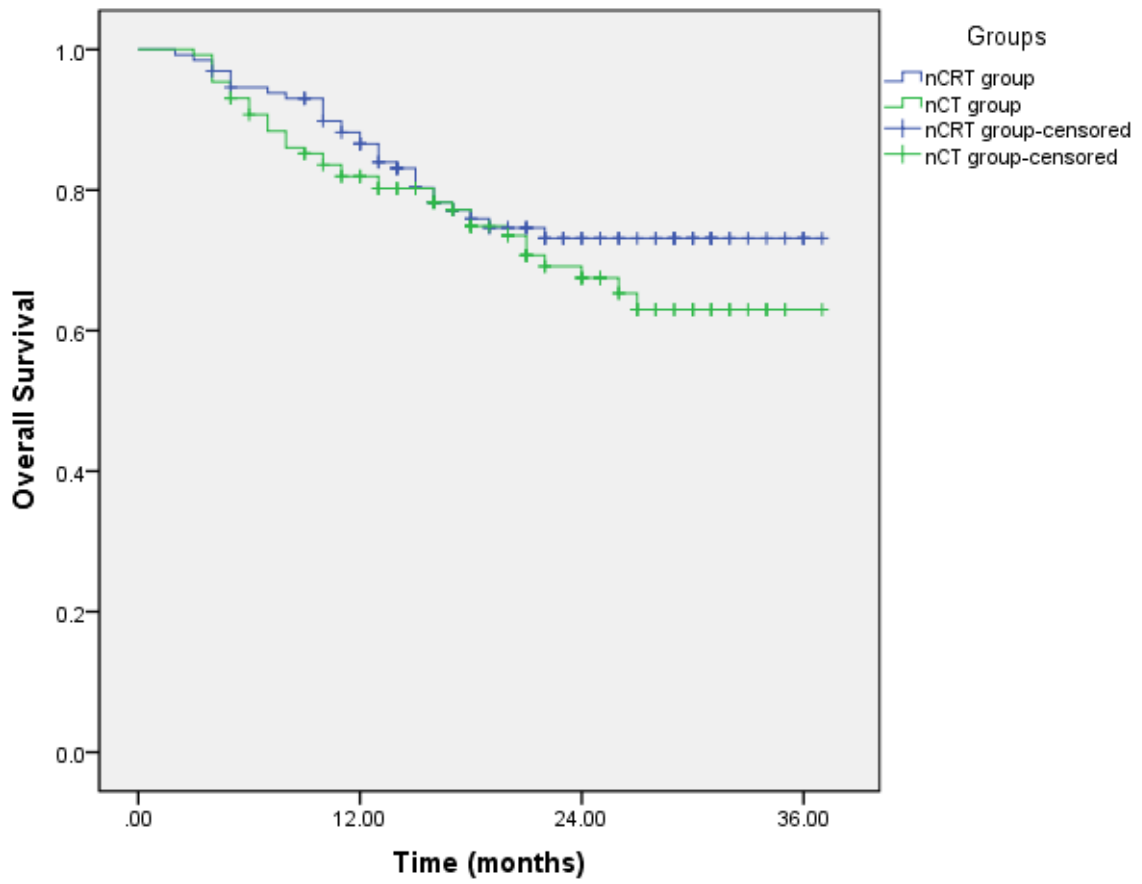

**eFigure.** The Overall Survival Curve of the Two Groups (Kaplan–Meier Plots)
